# Supplementary material
Source: ML conference proceedings conference paper supplement (https://openaccess.thecvf.com/content/CVPR2022/html/Yang_Cross-Image_Relational_Knowledge_CVPR_2022_paper.html)
Supplement: Supplementary file 1 [file Yang_Cross-Image_Relational_Knowledge_CVPR_2022_supplemental.pdf]

# Cross-Image Relational Knowledge Distillation for Semantic Segmentation

Chuanguang Yang<sup>1,2</sup> Helong Zhou<sup>3</sup> Zhulin An<sup>1\*</sup> Xue Jiang<sup>4</sup>

Yongjun Xu<sup>1</sup> Qian Zhang<sup>3</sup>

<sup>1</sup>Institute of Computing Technology, Chinese Academy of Sciences, Beijing, China

<sup>2</sup>University of Chinese Academy of Sciences, Beijing, China

<sup>3</sup>Horizon Robotics <sup>4</sup>School of Computer Science, Wuhan University

{yangchuanguang, anzhulin, xyj}@ict.ac.cn

{helong.zhou, qian01.zhang}@horizon.ai jxt@whu.edu.cn

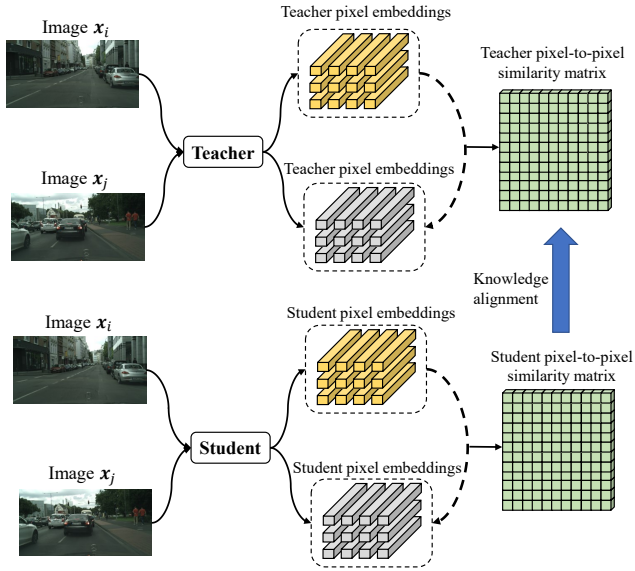

Figure 1. Overview of mini-batch based pixel-to-pixel distillation.

\*Corresponding author.
